# Supplementary material for: Identification of Ovine KRTAP28-1 and Its Association with Wool Fibre Diameter
Source: PubMed Central journal article supplement (PMC6523819; doi:10.3390/ani9040142), 2019-04-02
Supplement: animals-09-00142-s001.pdf [file animals-09-00142-s001.pdf]

# Supplementary Files: Identification of Ovine *KRTAP28-1* and Its Association with Wool Fibre Diameter

(A)

|          |                                                                                                                                                                                                                                                                                                                                                                                                                                                                                        |     |
|----------|----------------------------------------------------------------------------------------------------------------------------------------------------------------------------------------------------------------------------------------------------------------------------------------------------------------------------------------------------------------------------------------------------------------------------------------------------------------------------------------|-----|
| hKAP23-1 | .MSYNC <sup>Y</sup> CC <sup>Y</sup> GN <sup>Y</sup> FS <sup>Y</sup> SS <sup>Y</sup> HS <sup>Y</sup> CE <sup>Y</sup> GYL <sup>Y</sup> C <sup>Y</sup> YS <sup>Y</sup> GY <sup>Y</sup> SR <sup>Y</sup> GG <sup>Y</sup> SS <sup>Y</sup> Y <sup>Y</sup> PS <sup>Y</sup> N <sup>Y</sup> .LVYSTEPLISQHL                                                                                                                                                                                       | 47  |
| sKAP28-1 | .MSSND <sup>Y</sup> SC <sup>Y</sup> SG <sup>Y</sup> NND <sup>Y</sup> SC <sup>Y</sup> SL <sup>Y</sup> GS <sup>Y</sup> Y <sup>Y</sup> CH <sup>Y</sup> V <sup>Y</sup> PV <sup>Y</sup> NS <sup>Y</sup> ST <sup>Y</sup> TL <sup>Y</sup> Y <sup>Y</sup> FTG <sup>Y</sup> .VNYGDAFD <sup>Y</sup> SS <sup>Y</sup> RN <sup>Y</sup>                                                                                                                                                              | 47  |
| sKAP3-1  | .....MACCAPRCCSVRTG <sup>Y</sup> PATTICSSDKFCRCGVCLPSTCPH                                                                                                                                                                                                                                                                                                                                                                                                                              | 38  |
| sKAP3-2  | .....MACCAPRCCSVRTG <sup>Y</sup> PATTICSSDKFCRCGVCLPSTCPH                                                                                                                                                                                                                                                                                                                                                                                                                              | 38  |
| sKAP3-3  | .....MACCARLCCSV <sup>Y</sup> PTT <sup>Y</sup> PATTICSSDKFCRCGVCLPSTCPH                                                                                                                                                                                                                                                                                                                                                                                                                | 38  |
| hKAP25-1 | MHNRSQ <sup>Y</sup> G <sup>Y</sup> FFF <sup>Y</sup> SS <sup>Y</sup> CH <sup>Y</sup> PQ <sup>Y</sup> NH <sup>Y</sup> V <sup>Y</sup> SY <sup>Y</sup> G <sup>Y</sup> C <sup>Y</sup> Q <sup>Y</sup> SP <sup>Y</sup> S <sup>Y</sup> F <sup>Y</sup> I <sup>Y</sup> FC <sup>Y</sup> RC <sup>Y</sup> Q <sup>Y</sup> SL <sup>Y</sup> N <sup>Y</sup> F <sup>Y</sup> V <sup>Y</sup> S <sup>Y</sup> RT <sup>Y</sup> C <sup>Y</sup> Y <sup>Y</sup> PL <sup>Y</sup> SY <sup>Y</sup> FS <sup>Y</sup>  | 50  |
|          |                                                                                                                                                                                                                                                                                                                                                                                                                                                                                        |     |
| hKAP23-1 | PAGFLSLQGLSGDLLGNP.....                                                                                                                                                                                                                                                                                                                                                                                                                                                                | 65  |
| sKAP28-1 | KTWLLD <sup>Y</sup> NS <sup>Y</sup> PET <sup>Y</sup> RD <sup>Y</sup> KL <sup>Y</sup> SS <sup>Y</sup> Y <sup>Y</sup> Q <sup>Y</sup> P <sup>Y</sup> SS <sup>Y</sup> CE <sup>Y</sup> PT <sup>Y</sup> TY <sup>Y</sup> KT <sup>Y</sup> SH <sup>Y</sup> YS <sup>Y</sup> ST <sup>Y</sup> LN <sup>Y</sup> CG <sup>Y</sup> H <sup>Y</sup> RC <sup>Y</sup> Y <sup>Y</sup> E <sup>Y</sup> Q <sup>Y</sup> L <sup>Y</sup> V <sup>Y</sup> LS <sup>Y</sup>                                            | 97  |
| sKAP3-1  | NI <sup>Y</sup> SL <sup>Y</sup> L <sup>Y</sup> Q <sup>Y</sup> PT <sup>Y</sup> CC <sup>Y</sup> DN <sup>Y</sup> SP <sup>Y</sup> V <sup>Y</sup> PC <sup>Y</sup> V <sup>Y</sup> Y <sup>Y</sup> PD <sup>Y</sup> TY <sup>Y</sup> V <sup>Y</sup> PT <sup>Y</sup> CF <sup>Y</sup> LL <sup>Y</sup> N <sup>Y</sup> SS <sup>Y</sup> H <sup>Y</sup> PT <sup>Y</sup> P <sup>Y</sup> GL <sup>Y</sup> SG <sup>Y</sup> IN <sup>Y</sup> L <sup>Y</sup> TT <sup>Y</sup> FI <sup>Y</sup> Q <sup>Y</sup> P | 88  |
| sKAP3-2  | DI <sup>Y</sup> SL <sup>Y</sup> L <sup>Y</sup> Q <sup>Y</sup> PT <sup>Y</sup> CC <sup>Y</sup> DN <sup>Y</sup> SP <sup>Y</sup> V <sup>Y</sup> PC <sup>Y</sup> V <sup>Y</sup> Y <sup>Y</sup> PD <sup>Y</sup> TY <sup>Y</sup> V <sup>Y</sup> PT <sup>Y</sup> CF <sup>Y</sup> LL <sup>Y</sup> N <sup>Y</sup> SS <sup>Y</sup> H <sup>Y</sup> PT <sup>Y</sup> P <sup>Y</sup> GL <sup>Y</sup> SG <sup>Y</sup> IN <sup>Y</sup> L <sup>Y</sup> TT <sup>Y</sup> FI <sup>Y</sup> Q <sup>Y</sup> P | 88  |
| sKAP3-3  | TV <sup>Y</sup> WF <sup>Y</sup> LE <sup>Y</sup> PT <sup>Y</sup> CC <sup>Y</sup> DN <sup>Y</sup> RP <sup>Y</sup> PP <sup>Y</sup> CHI <sup>Y</sup> P <sup>Y</sup> Q <sup>Y</sup> PS <sup>Y</sup> V <sup>Y</sup> PT <sup>Y</sup> CF <sup>Y</sup> LL <sup>Y</sup> N <sup>Y</sup> SS <sup>Y</sup> Q <sup>Y</sup> PT <sup>Y</sup> P <sup>Y</sup> GL <sup>Y</sup> ES <sup>Y</sup> IN <sup>Y</sup> L <sup>Y</sup> TT <sup>Y</sup> Y <sup>Y</sup> T <sup>Y</sup> Q <sup>Y</sup> P               | 88  |
| hKAP25-1 | YGNQTIG <sup>Y</sup> SI <sup>Y</sup> NS <sup>Y</sup> FR <sup>Y</sup> SL <sup>Y</sup> NY <sup>Y</sup> V <sup>Y</sup> SH <sup>Y</sup> S <sup>Y</sup> F <sup>Y</sup> Q <sup>Y</sup> PI <sup>Y</sup> S <sup>Y</sup> FM <sup>Y</sup> H <sup>Y</sup> SS <sup>Y</sup> F <sup>Y</sup> Q <sup>Y</sup> PAC <sup>Y</sup> S <sup>Y</sup> DF <sup>Y</sup> V <sup>Y</sup> GW <sup>Y</sup> Q <sup>Y</sup> SP <sup>Y</sup> FL <sup>Y</sup> RR                                                          | 100 |
|          |                                                                                                                                                                                                                                                                                                                                                                                                                                                                                        |     |
| hKAP23-1 | .....                                                                                                                                                                                                                                                                                                                                                                                                                                                                                  | 65  |
| sKAP28-1 | PLVRI <sup>Y</sup> SP <sup>Y</sup> V <sup>Y</sup> L <sup>Y</sup> V <sup>Y</sup> NR <sup>Y</sup> QC <sup>Y</sup> IM <sup>Y</sup> CV <sup>Y</sup> CV <sup>Y</sup> CV <sup>Y</sup> CV <sup>Y</sup> V <sup>Y</sup> HA <sup>Y</sup> HT <sup>Y</sup> LS <sup>Y</sup> H <sup>Y</sup> V <sup>Y</sup> QL <sup>Y</sup> F <sup>Y</sup> V <sup>Y</sup> TP                                                                                                                                          | 135 |
| sKAP3-1  | GCENVCEPRC.....                                                                                                                                                                                                                                                                                                                                                                                                                                                                        | 98  |
| sKAP3-2  | GCENVCEPRC.....                                                                                                                                                                                                                                                                                                                                                                                                                                                                        | 98  |
| sKAP3-3  | SCEPCIPSC.....                                                                                                                                                                                                                                                                                                                                                                                                                                                                         | 98  |
| hKAP25-1 | TC.....                                                                                                                                                                                                                                                                                                                                                                                                                                                                                | 102 |

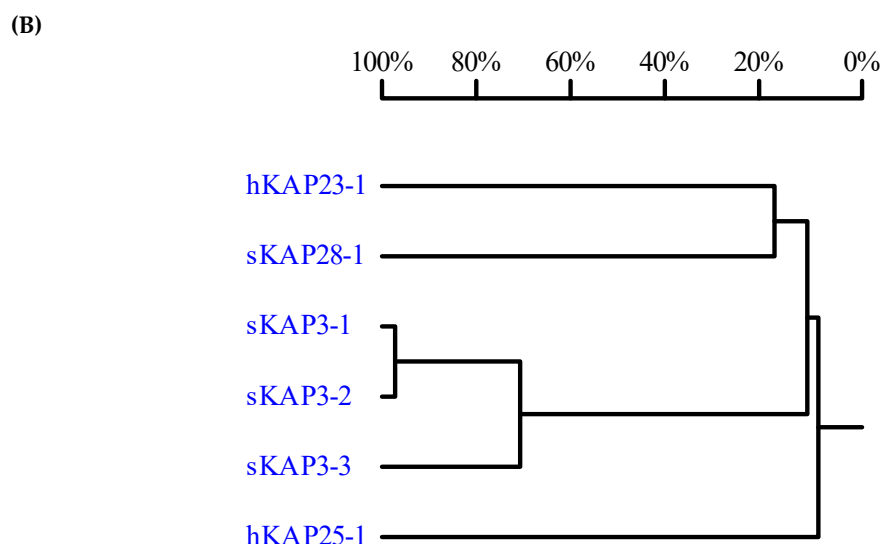

**Figure S1.** Comparison of the predicated amino acid sequences of the newly identified ovine KAP28-1 gene and other similar KAP genes. Three ovine KAP3-n genes and the human KAP23-1 gene that are shown to be most related to ovine KAP28-1 in Figure 1 are used for the comparison, together with the human KAP25-1 gene. The alignment of these sequences is shown (A), together with the sequence homology tree (B). The ovine KAPs are indicated with a prefix “s”, while the human KAPs are indicated with “h”. The GenBank accession numbers for other KAP genes are: M21099 (sKAP3-1), M21100 (sKAP3-2), M21103 (sKAP3-3), NM\_181624 (hKAP23-1) and NM\_001128598 (hKAP25-1).
